# Supplementary material for: Exploring the Solid-State Landscape of Carbamazepine during Dehydration: A Low Frequency Raman Spectroscopy Perspective
Source: MDPI journal article supplement (doi:10.3390/pharmaceutics15051526), 2023-05-18
Supplement: s1 [file s1]

Table S1. Vibrational mode assignment for the calculated LFR spectrum of CBZ-DH. Bold assignments are considered as strong characteristic peaks.

| Experimental Raman shift / $\text{cm}^{-1}$ | Theoeretical Raman shift / $\text{cm}^{-1}$ | Relative Intensity | Normal modes         | Principal axis |
|---------------------------------------------|---------------------------------------------|--------------------|----------------------|----------------|
| <b>19</b>                                   | <b>21</b>                                   | <b>9</b>           | <b>Translational</b> | <b>ac</b>      |
| 64                                          | 64                                          | 8                  | Torsional            | abc            |
| 77                                          | 77                                          | 25                 | Torsional            | ab             |
| 86                                          | 89                                          | 11                 | Torsional            | ac             |
| <b>115</b>                                  | <b>119</b>                                  | <b>100</b>         | <b>Torsional</b>     | <b>abc</b>     |
| 129                                         | 125                                         | 30                 | Torsional            | abc            |
| 147                                         | 151                                         | 7                  | Torsional            | abc            |
| 172                                         | 175                                         | 24                 | Torsional            | abc            |
| 260                                         | 258                                         | 5                  | Torsional            | abc            |

Table S2. Vibrational mode assignment for the calculated LFR spectrum of CBZ-I. Bold assignments are considered as strong characteristic peaks.

| Experimental Raman shift / $\text{cm}^{-1}$ | Theoeretical Raman shift / $\text{cm}^{-1}$ | Relative Intensity | Normal modes        | Principal axis |
|---------------------------------------------|---------------------------------------------|--------------------|---------------------|----------------|
| <b>24</b>                                   | <b>23</b>                                   | <b>100</b>         | <b>Tranlational</b> | <b>ac</b>      |
| 36                                          | 32                                          | 68                 | Translational       | ab             |
| 43                                          | 49                                          | 39                 | Torsional           | abc            |
| <b>68</b>                                   | <b>67</b>                                   | <b>73</b>          | <b>Torsional</b>    | <b>abc</b>     |
| <b>73</b>                                   | <b>76</b>                                   | <b>73</b>          | <b>Torsional</b>    | <b>abc</b>     |
| 90                                          | 97                                          | 99                 | Torsional           | ac             |
| <b>110</b>                                  | <b>117</b>                                  | <b>46</b>          | <b>Torsional</b>    | <b>ac</b>      |
| <b>122</b>                                  | <b>127</b>                                  | <b>52</b>          | <b>Torsional</b>    | <b>bc</b>      |
| 172                                         | 175                                         | 38                 | Torsional           | abc            |
| <b>265</b>                                  | <b>267</b>                                  | <b>5</b>           | <b>Torsional</b>    | <b>ab</b>      |

Table S3. Vibrational mode assignment for the calculated LFR spectrum of CBZ-II. Bold assignments are considered as strong characteristic peaks.

| Theoeretical Raman shift / $\text{cm}^{-1}$ | Relative Intensity | Normal modes         | Principal axis |
|---------------------------------------------|--------------------|----------------------|----------------|
| <b>21</b>                                   | <b>100</b>         | <b>Translational</b> | <b>ac</b>      |
| <b>28</b>                                   | <b>58</b>          | <b>Torsional</b>     | <b>abc</b>     |
| <b>61</b>                                   | <b>40</b>          | <b>Torsional</b>     | <b>abc</b>     |
| <b>67</b>                                   | <b>73</b>          | <b>Torsional</b>     | <b>ac</b>      |
| 87                                          | 52                 | Torsional            | abc            |
| <b>108</b>                                  | <b>34</b>          | <b>Torsional</b>     | <b>abc</b>     |
| 118                                         | 36                 | Torsional            | abc            |
| 126                                         | 26                 | Torsional            | abc            |
| 144                                         | 8                  | Torsional            | abc            |
| <b>171</b>                                  | <b>10</b>          | <b>Torsional</b>     | <b>ac</b>      |
| 250                                         | 1                  | Torsional            | abc            |
| <b>261</b>                                  | <b>4</b>           | <b>Torsional</b>     | <b>abc</b>     |
| 273                                         | 2                  | Torsional            | abc            |

Table S4. Vibrational mode assignment for the calculated LFR spectrum of CBZ-III. Bold assignments are considered as strong characteristic peaks.

| Experimental<br>Raman shift / $\text{cm}^{-1}$ | Theoretical<br>Raman shift / $\text{cm}^{-1}$ | Relative Intensity | Normal modes         | Principal axis |
|------------------------------------------------|-----------------------------------------------|--------------------|----------------------|----------------|
| <b>42</b>                                      | <b>48</b>                                     | <b>37</b>          | <b>Translational</b> | <b>ac</b>      |
| 51                                             | 53                                            | 15                 | Torsional            | abc            |
| 68                                             | 72                                            | 3                  | Torsional            | abc            |
| 76                                             | 89                                            | 21                 | Torsional            | ab             |
| <b>92</b>                                      | <b>97</b>                                     | <b>40</b>          | <b>Torsional</b>     | <b>ab</b>      |
| <b>105</b>                                     | <b>110</b>                                    | <b>24</b>          | <b>Torsional</b>     | <b>ab</b>      |
| <b>118</b>                                     | <b>124</b>                                    | <b>32</b>          | <b>Torsional</b>     | <b>abc</b>     |
| <b>130</b>                                     | <b>139</b>                                    | <b>55</b>          | <b>Torsional</b>     | <b>abc</b>     |
| <b>144</b>                                     | <b>149</b>                                    | <b>64</b>          | <b>Torsional</b>     | <b>ab</b>      |
| 169                                            | 171                                           | 15                 | Torsional            | abc            |
| 175                                            | 181                                           | 9                  | Torsional            | ac             |
| 185                                            | 191                                           | 43                 | Torsional            | ab             |
| 253                                            | 254                                           | 6                  | Torsional            | ab             |
| 276                                            | 278                                           | 9                  | Torsional            | ab             |

Table S5. Vibrational mode assignment for the calculated LFR spectrum of CBZ-IV. Bold assignments are considered as strong characteristic peaks.

| Experimental<br>Raman shift / $\text{cm}^{-1}$ | Theoretical<br>Raman shift / $\text{cm}^{-1}$ | Relative Intensity | Normal modes         | Principal axis |
|------------------------------------------------|-----------------------------------------------|--------------------|----------------------|----------------|
| <b>24</b>                                      | <b>20</b>                                     | <b>100</b>         | <b>Translational</b> | <b>bc</b>      |
| <b>51</b>                                      | <b>58</b>                                     | <b>18</b>          | <b>Translational</b> | <b>ac</b>      |
| <b>68</b>                                      | <b>70</b>                                     | <b>31</b>          | <b>Translational</b> | <b>ab</b>      |
| <b>75</b>                                      | <b>84</b>                                     | <b>49</b>          | <b>Torsional</b>     | <b>abc</b>     |
| 90                                             | 98                                            | 24                 | Torsional            | abc            |
| <b>115</b>                                     | <b>127</b>                                    | <b>79</b>          | <b>Torsional</b>     | <b>bc</b>      |
| <b>172</b>                                     | <b>189</b>                                    | <b>22</b>          | <b>Torsional</b>     | <b>abc</b>     |
| <b>255</b>                                     | <b>252</b>                                    | <b>5</b>           | <b>Torsional</b>     | <b>abc</b>     |
| <b>262</b>                                     | <b>262</b>                                    | <b>2</b>           | <b>Torsional</b>     | <b>abc</b>     |

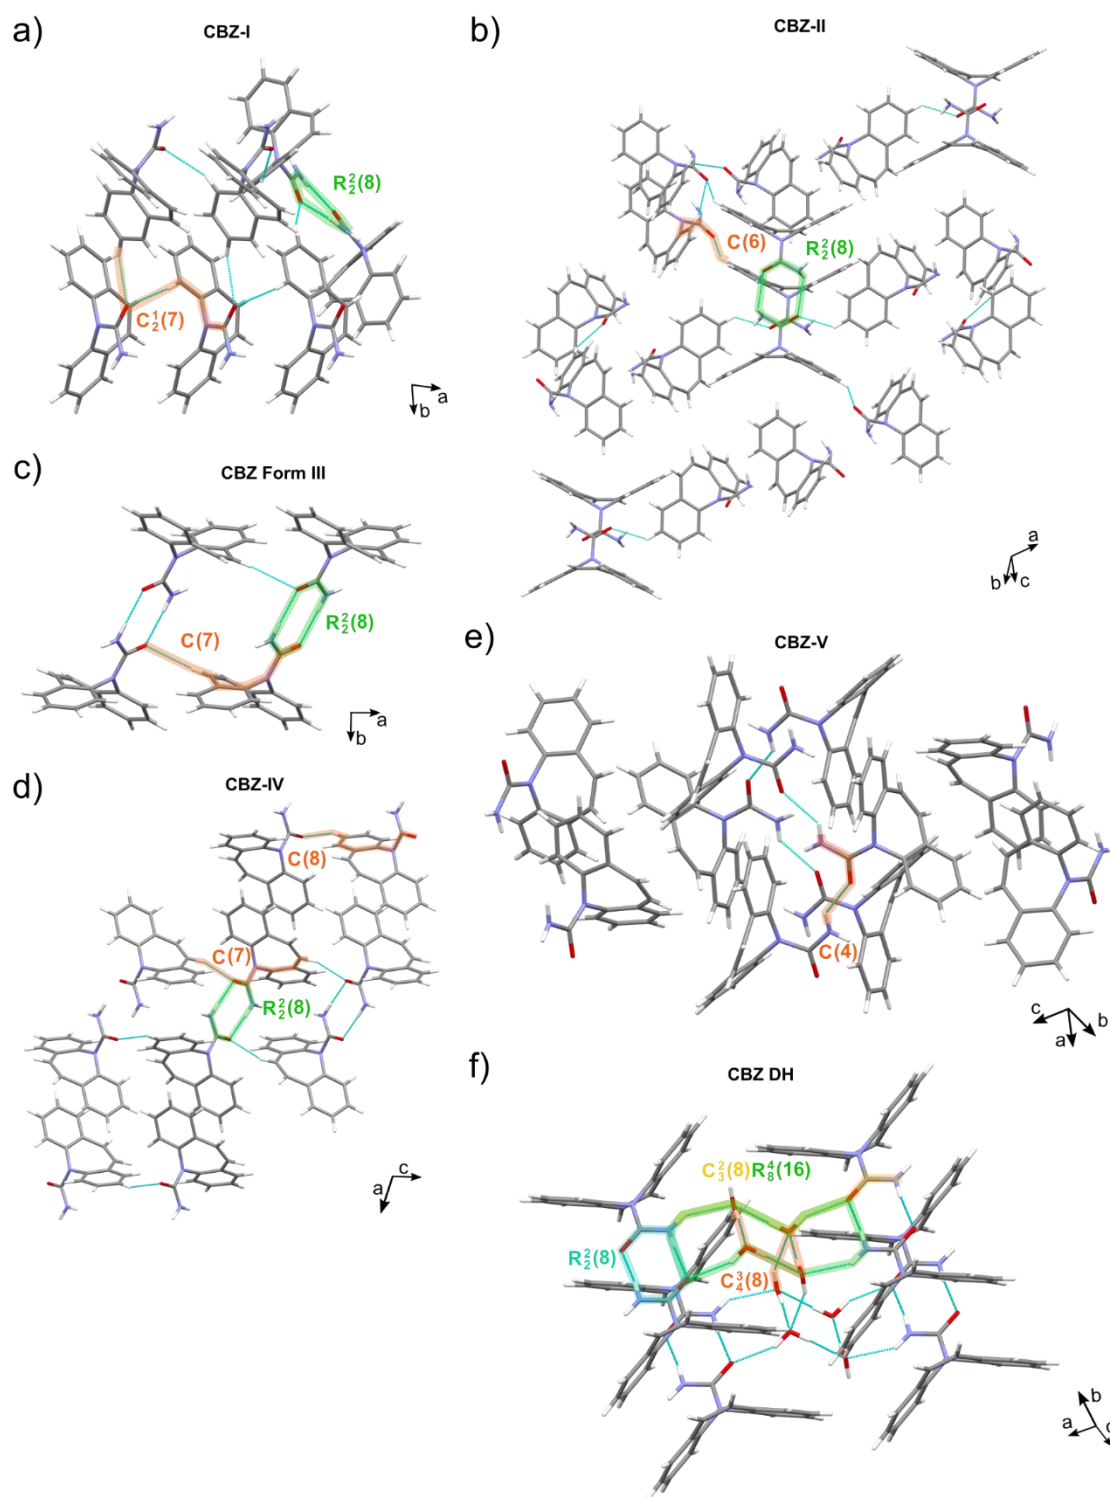

**Figure S1.** Hydrogen patterns of a) CBZ-I, b) CBZ-II, c) CBZ-III, d) CBZ-IV, e) CBZ-V, and f) CBZ-DH.

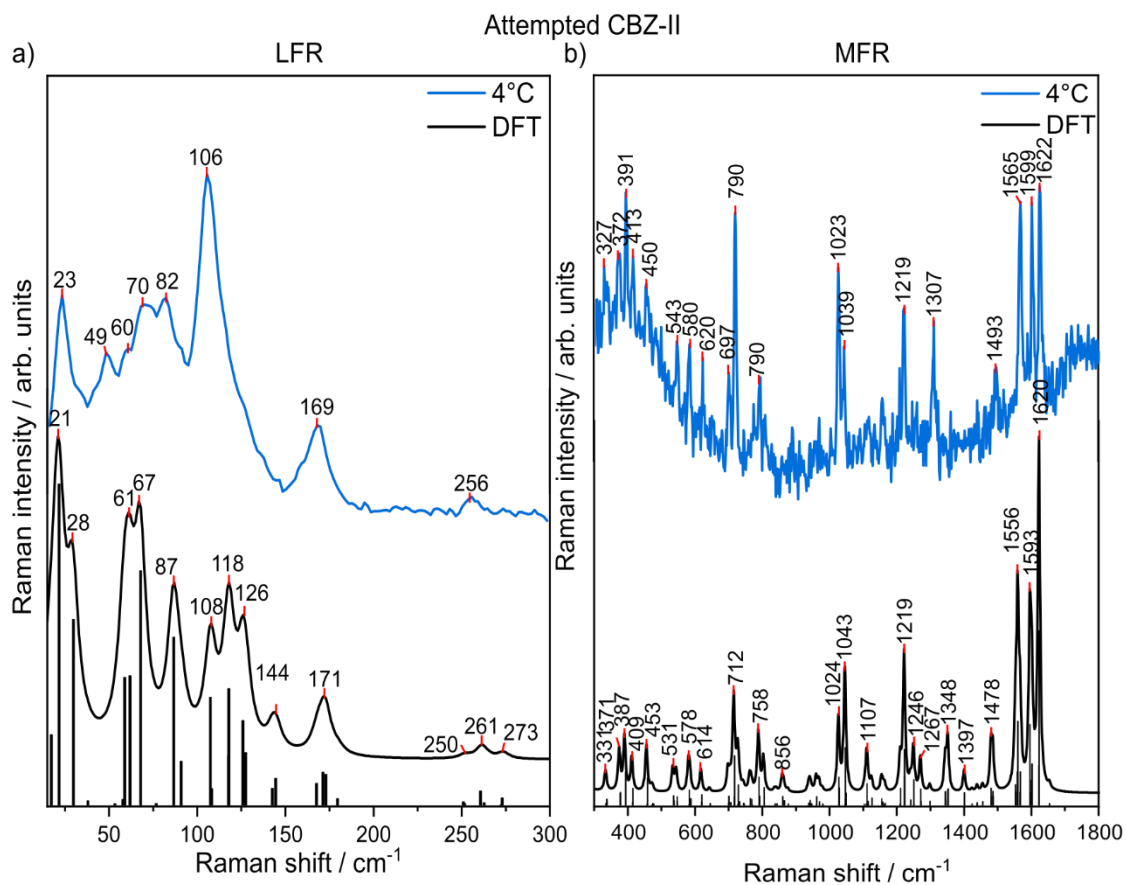

**Figure S2.** a) Low- and b) mid- frequency Raman spectra of attempted anhydrous carbamazepine form II (CBZ-II, blue) compared theoretical Raman spectra of CBZ-II (black).

CBZ-I

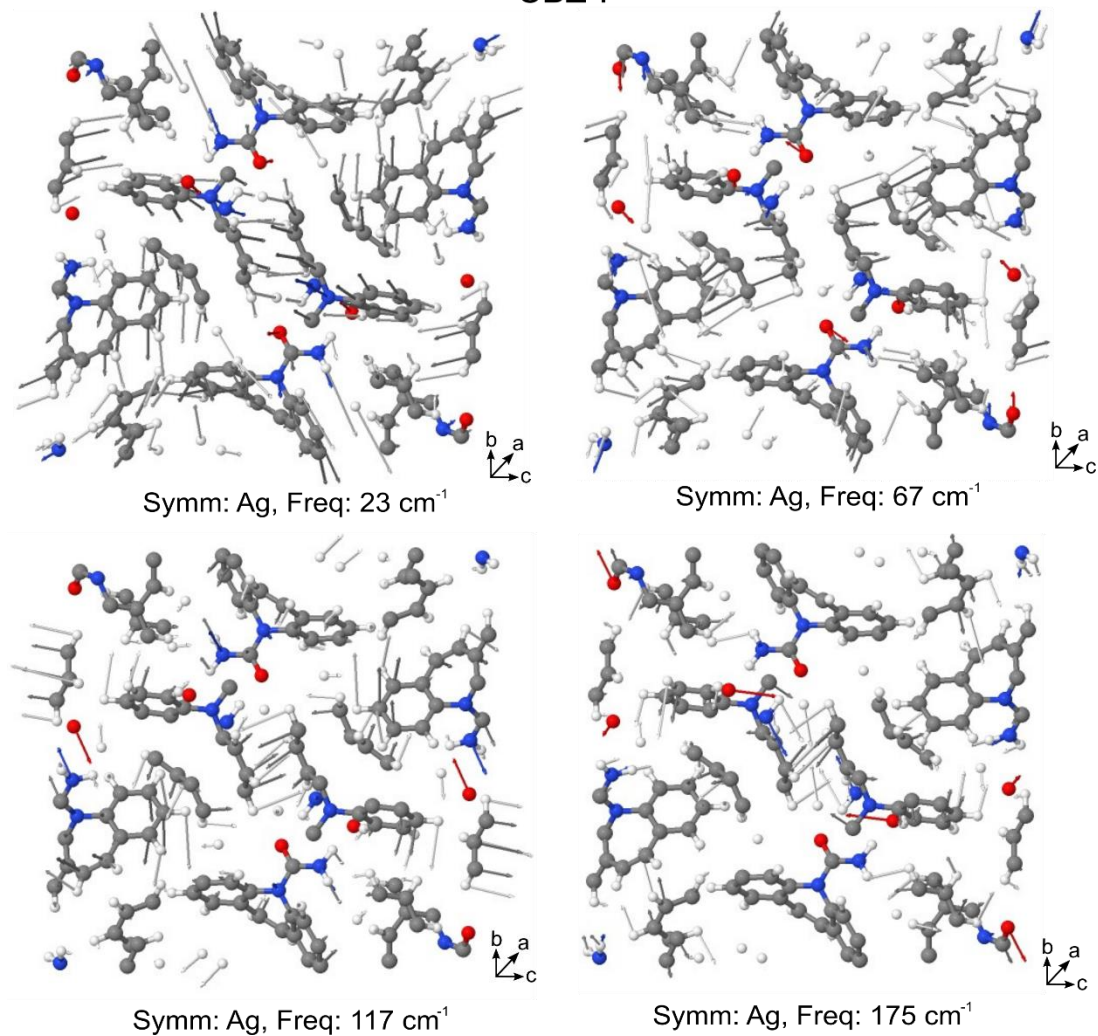

**Figure S3.** Visualization of selected low-frequency vibrational modes of CBZ-I.

CBZ-III

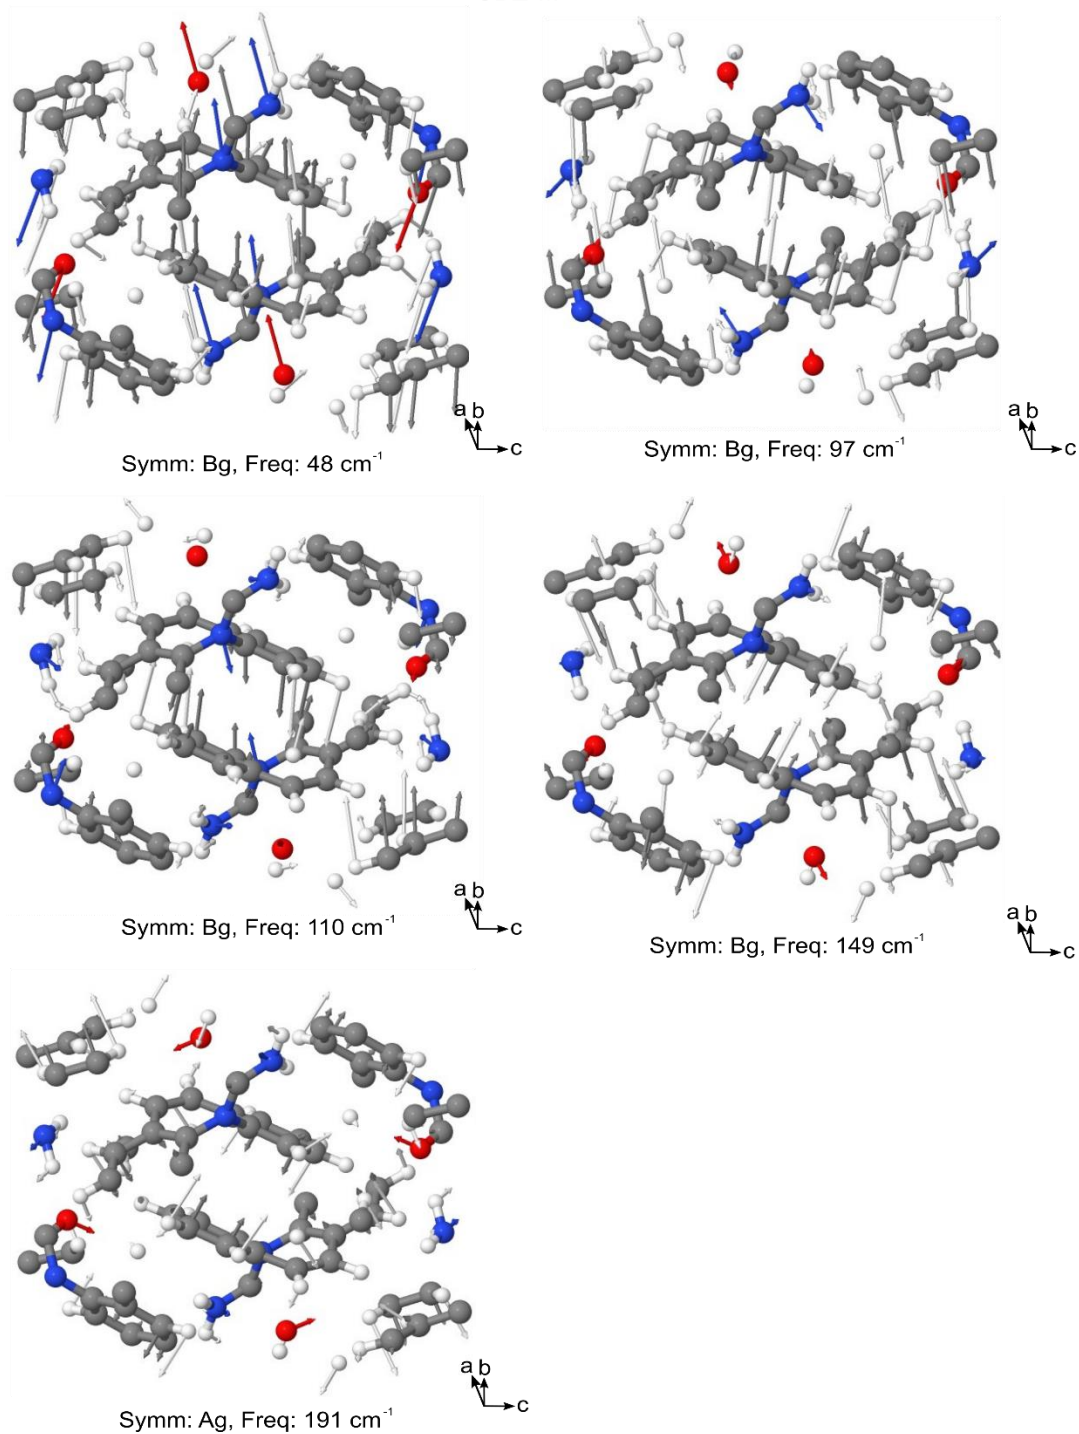

**Figure S4.** Visualization of selected low-frequency vibrational modes of CBZ-III.



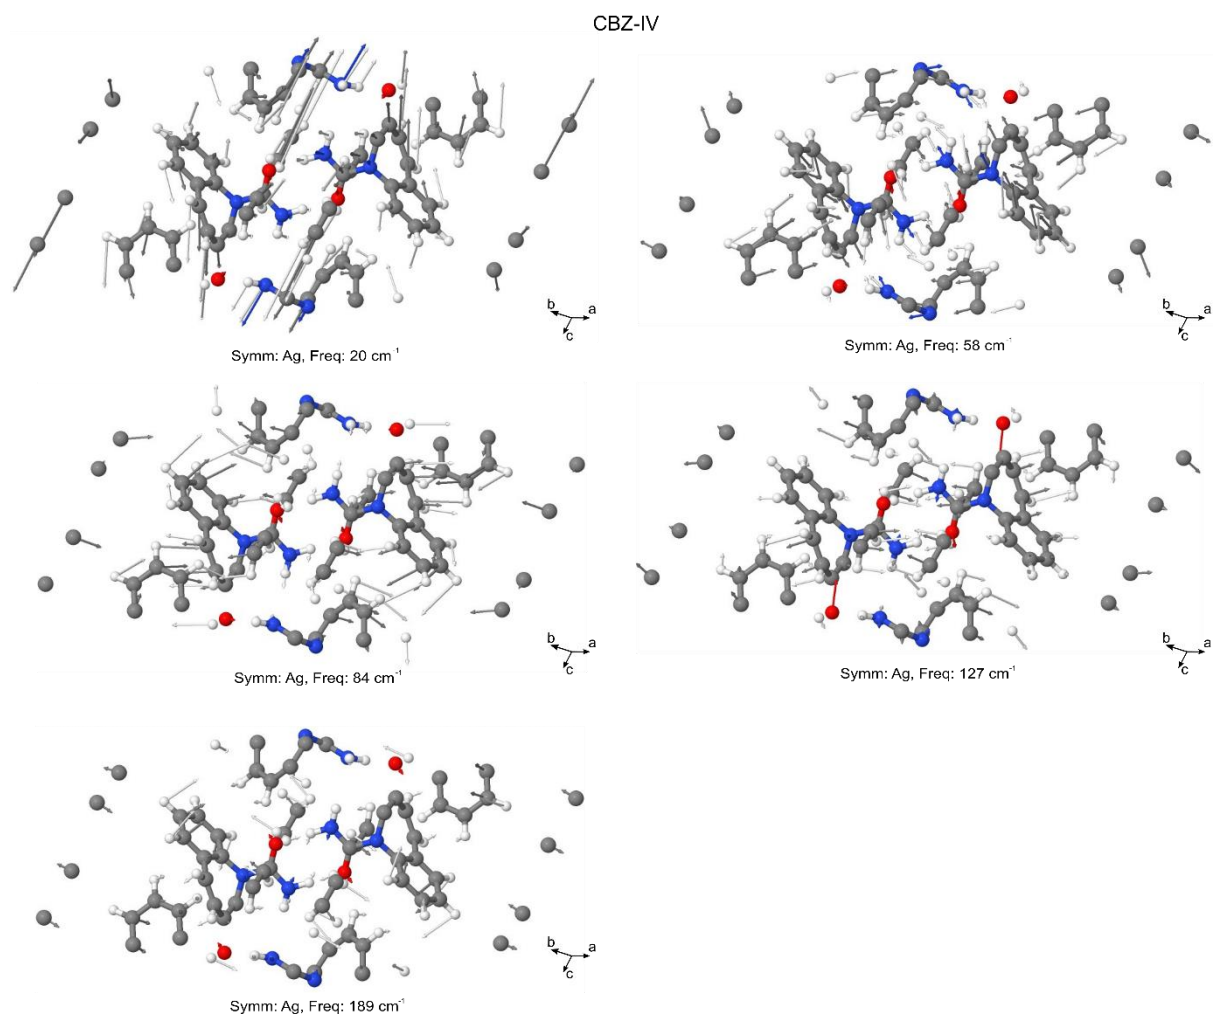

**Figure S5.** Visualization of selected low-frequency vibrational modes of CBZ-IV.

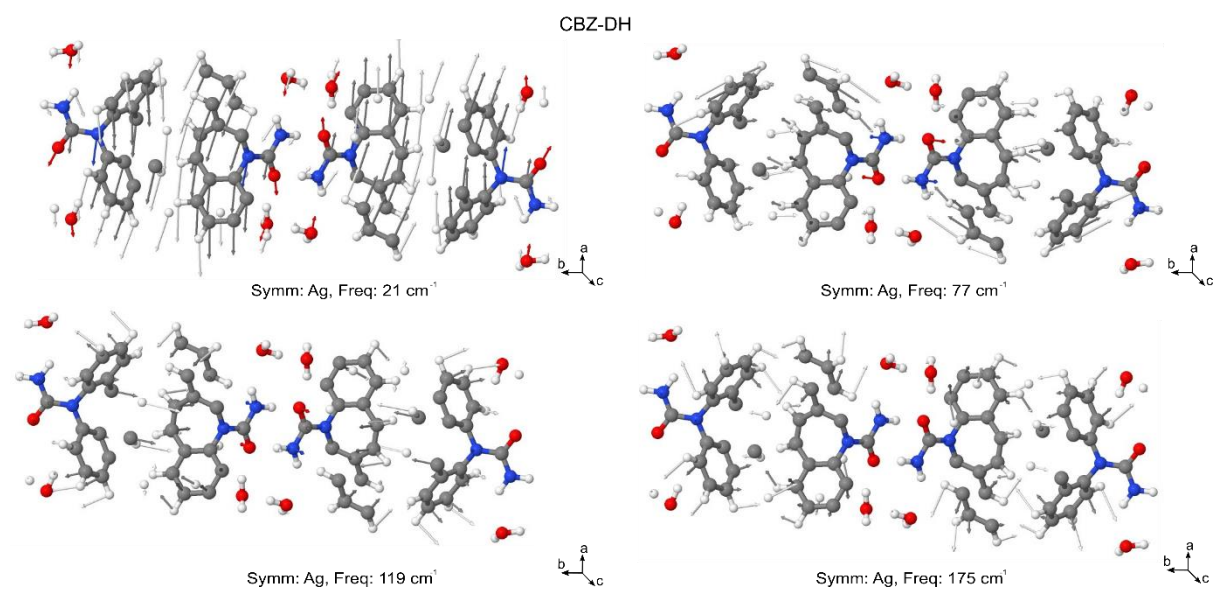

**Figure S6.** Visualization of selected low-frequency vibrational modes of CBZ-DH.

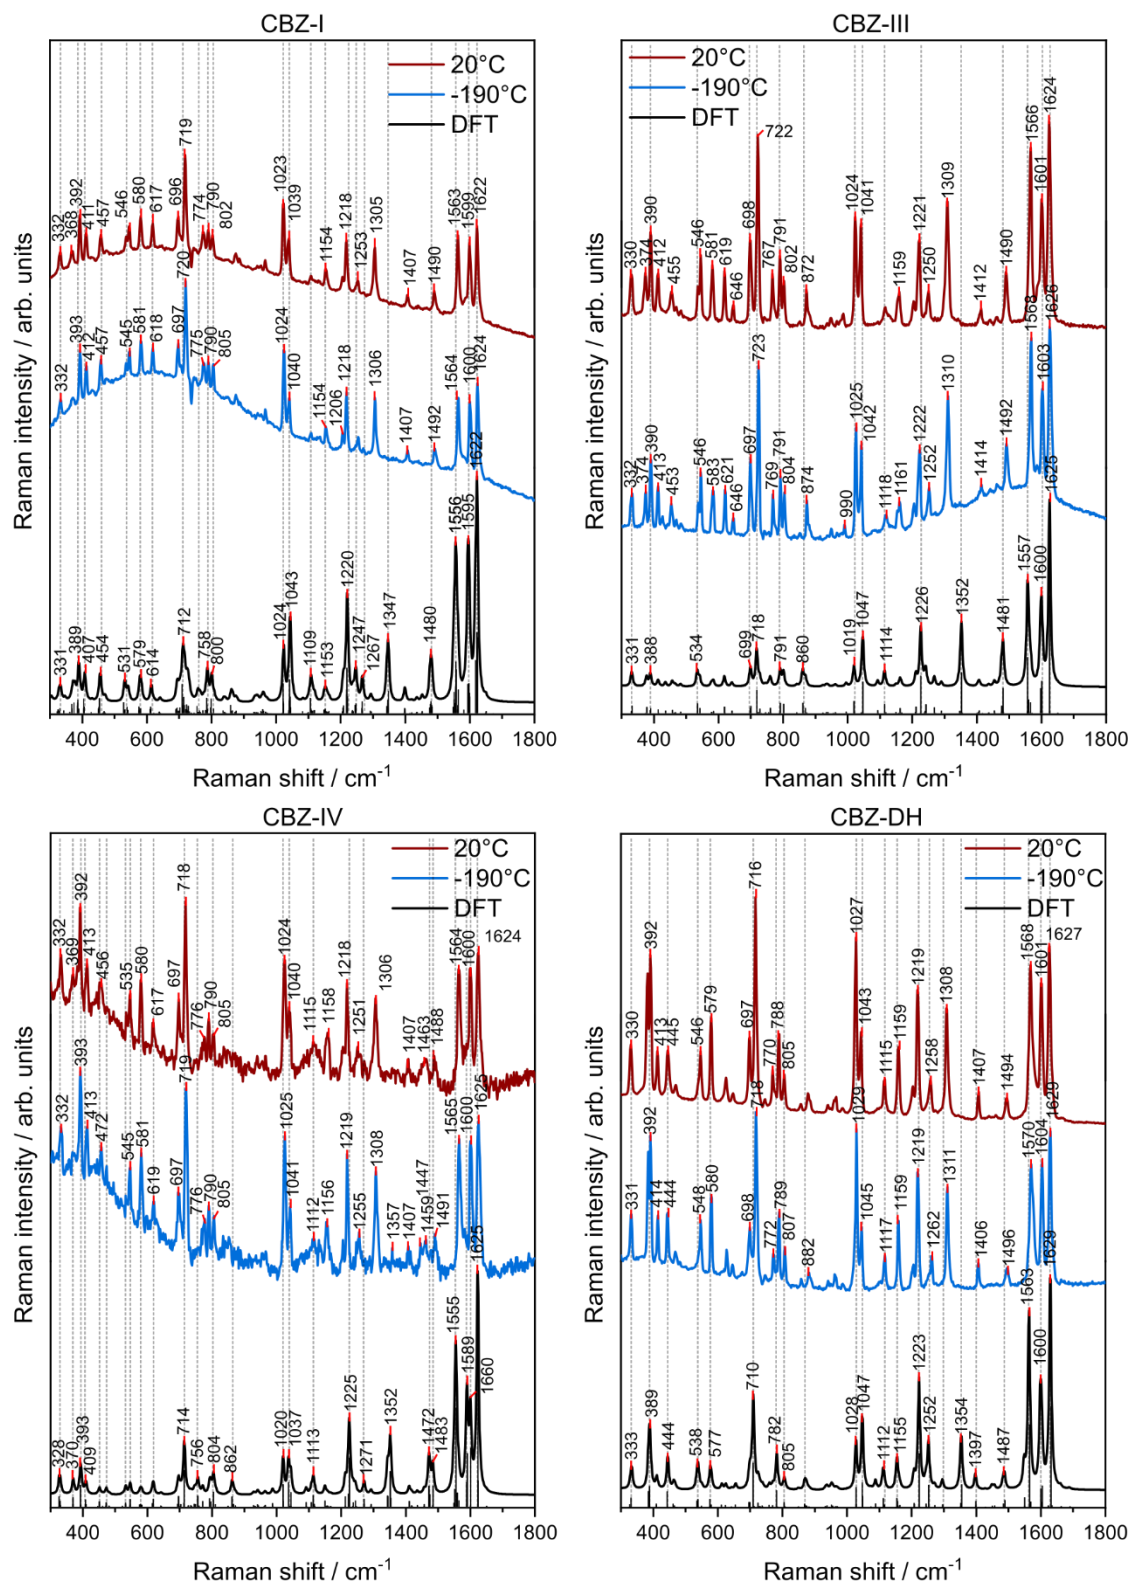

**Figure S7.** Mid-frequency Raman (MFR) spectra of a) CBZ-I, b) CBZ-III, c) CBZ-IV, and d) CBZ-DH collected at 20 °C (red) and -190 °C (blue) in comparison to their corresponding DFT calculated Raman spectra (black).



Table S6. Experimental and theoretical Raman peaks of CBZ-DH (medium to strong) and their mean average deviation.

| Experimental Raman shift / $\text{cm}^{-1}$ | Theoretical Raman shift / $\text{cm}^{-1}$ | Mean average deviation / $\text{cm}^{-1}$ |
|---------------------------------------------|--------------------------------------------|-------------------------------------------|
| 19                                          | 21                                         | 5.4                                       |
| 64                                          | 64                                         |                                           |
| 77                                          | 77                                         |                                           |
| 86                                          | 89                                         |                                           |
| 115                                         | 119                                        |                                           |
| 129                                         | 125                                        |                                           |
| 147                                         | 151                                        |                                           |
| 172                                         | 175                                        |                                           |
| 260                                         | 258                                        |                                           |
| 331                                         | 333                                        |                                           |
| 392                                         | 389                                        |                                           |
| 444                                         | 444                                        |                                           |
| 548                                         | 538                                        |                                           |
| 580                                         | 577                                        |                                           |
| 718                                         | 710                                        |                                           |
| 772                                         | 782                                        |                                           |
| 807                                         | 805                                        |                                           |
| 1029                                        | 1028                                       |                                           |
| 1045                                        | 1047                                       |                                           |
| 1117                                        | 1112                                       |                                           |
| 1159                                        | 1155                                       |                                           |
| 1219                                        | 1223                                       |                                           |
| 1262                                        | 1252                                       |                                           |
| 1311                                        | 1354                                       |                                           |
| 1406                                        | 1397                                       |                                           |
| 1496                                        | 1487                                       |                                           |
| 1570                                        | 1563                                       |                                           |
| 1604                                        | 1600                                       |                                           |
| 1629                                        | 1629                                       |                                           |

Table S7. Experimental and theoretical Raman peaks of CBZ-I (medium to strong) and their mean average deviation.

| Experimental Raman shift / $\text{cm}^{-1}$ | Theoretical Raman shift / $\text{cm}^{-1}$ | Mean average deviation / $\text{cm}^{-1}$ |
|---------------------------------------------|--------------------------------------------|-------------------------------------------|
| 24                                          | 23                                         | 7.8                                       |
| 36                                          | 32                                         |                                           |
| 43                                          | 49                                         |                                           |
| 68                                          | 67                                         |                                           |
| 73                                          | 76                                         |                                           |
| 90                                          | 97                                         |                                           |
| 110                                         | 117                                        |                                           |
| 122                                         | 127                                        |                                           |
| 172                                         | 175                                        |                                           |
| 265                                         | 267                                        |                                           |
| 332                                         | 331                                        |                                           |
| 393                                         | 389                                        |                                           |
| 412                                         | 407                                        |                                           |
| 457                                         | 454                                        |                                           |
| 545                                         | 531                                        |                                           |
| 581                                         | 579                                        |                                           |
| 618                                         | 614                                        |                                           |
| 720                                         | 712                                        |                                           |
| 775                                         | 758                                        |                                           |
| 805                                         | 800                                        |                                           |
| 1024                                        | 1024                                       |                                           |
| 1040                                        | 1043                                       |                                           |
| 1206                                        | 1153                                       |                                           |
| 1218                                        | 1218                                       |                                           |
| 1306                                        | 1347                                       |                                           |
| 1492                                        | 1480                                       |                                           |
| 1564                                        | 1556                                       |                                           |
| 1600                                        | 1595                                       |                                           |
| 1624                                        | 1622                                       |                                           |

Table S8. Experimental and theoretical Raman peaks of CBZ-III (medium to strong) and their mean average deviation.

| Experimental Raman shift / $\text{cm}^{-1}$ | Theoretical Raman shift / $\text{cm}^{-1}$ | Mean average deviation / $\text{cm}^{-1}$ |
|---------------------------------------------|--------------------------------------------|-------------------------------------------|
| <b>42</b>                                   | <b>48</b>                                  | 6.7                                       |
| 51                                          | 53                                         |                                           |
| 68                                          | 72                                         |                                           |
| 76                                          | 89                                         |                                           |
| <b>92</b>                                   | <b>97</b>                                  |                                           |
| <b>105</b>                                  | <b>110</b>                                 |                                           |
| <b>118</b>                                  | <b>124</b>                                 |                                           |
| <b>130</b>                                  | <b>139</b>                                 |                                           |
| <b>144</b>                                  | <b>149</b>                                 |                                           |
| 169                                         | 171                                        |                                           |
| 175                                         | 181                                        |                                           |
| 185                                         | 191                                        |                                           |
| 253                                         | 254                                        |                                           |
| 276                                         | 278                                        |                                           |
| 332                                         | 331                                        |                                           |
| 390                                         | 388                                        |                                           |
| 546                                         | 534                                        |                                           |
| 791                                         | 791                                        |                                           |
| 874                                         | 860                                        |                                           |
| 1025                                        | 1019                                       |                                           |
| 1042                                        | 1047                                       |                                           |
| 1118                                        | 1114                                       |                                           |
| 1222                                        | 1226                                       |                                           |
| 1310                                        | 1352                                       |                                           |
| 1492                                        | 1481                                       |                                           |
| 1568                                        | 1557                                       |                                           |
| 1603                                        | 1600                                       |                                           |
| 1626                                        | 1625                                       |                                           |

Table S9. Experimental and theoretical Raman peaks of CBZ-IV (medium to strong) and their mean average deviation.

| Experimental Raman shift / $\text{cm}^{-1}$ | Theoretical Raman shift / $\text{cm}^{-1}$ | Mean average deviation / $\text{cm}^{-1}$ |
|---------------------------------------------|--------------------------------------------|-------------------------------------------|
| <b>24</b>                                   | <b>20</b>                                  | 6.3                                       |
| <b>51</b>                                   | <b>58</b>                                  |                                           |
| <b>68</b>                                   | <b>70</b>                                  |                                           |
| <b>75</b>                                   | <b>84</b>                                  |                                           |
| 90                                          | 98                                         |                                           |
| <b>115</b>                                  | <b>127</b>                                 |                                           |
| <b>172</b>                                  | <b>189</b>                                 |                                           |
| <b>255</b>                                  | <b>252</b>                                 |                                           |
| <b>262</b>                                  | <b>262</b>                                 |                                           |
| <b>332</b>                                  | <b>328</b>                                 |                                           |
| 393                                         | 393                                        |                                           |
| <b>413</b>                                  | <b>409</b>                                 |                                           |
| 719                                         | 714                                        |                                           |
| 776                                         | 756                                        |                                           |
| 805                                         | 804                                        |                                           |
| 1025                                        | 1020                                       |                                           |
| 1041                                        | 1037                                       |                                           |
| 1112                                        | 1113                                       |                                           |
| 1219                                        | 1225                                       |                                           |
| 1255                                        | 1271                                       |                                           |
| 1357                                        | 1352                                       |                                           |
| 1459                                        | 1472                                       |                                           |
| 1491                                        | 1483                                       |                                           |
| 1565                                        | 1555                                       |                                           |
| 1600                                        | 1600                                       |                                           |
| 1625                                        | 1625                                       |                                           |

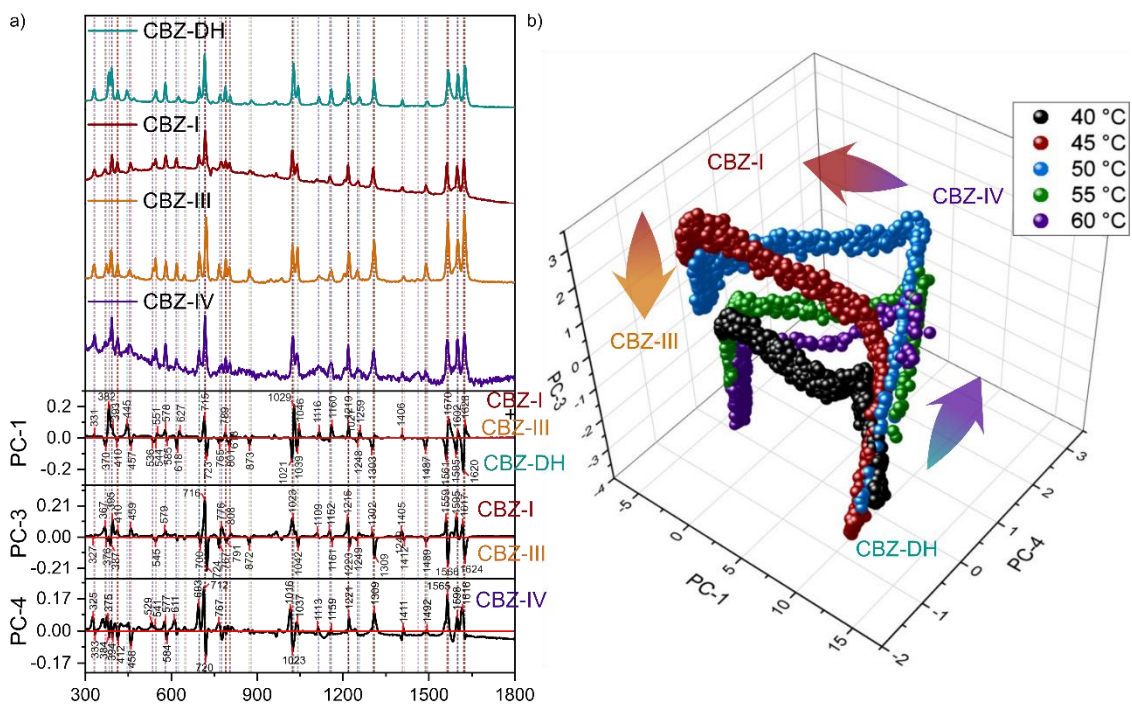

**Figure S8.** PCA loadings (left) and scores (right) for data collected from all temperatures and the mid-frequency Raman spectral region. For ease of visualization, the mean scores value at each time point for each replicate run is shown.

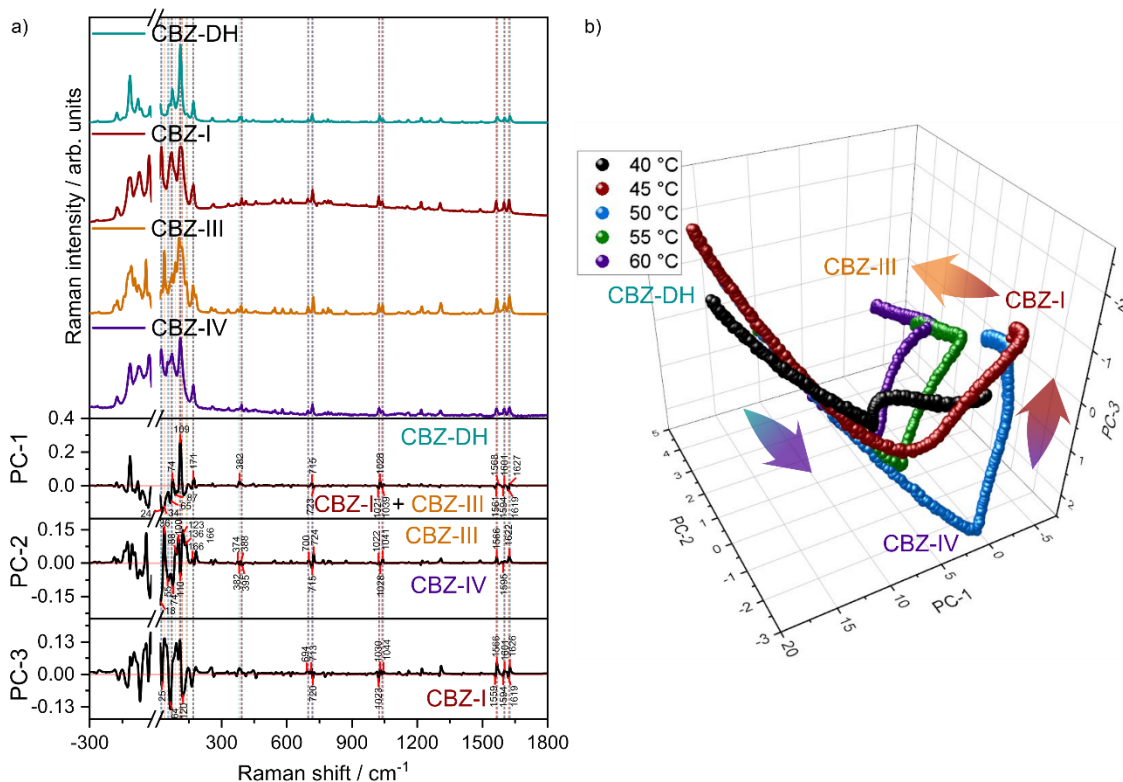

**Figure S9.** PCA loadings (left) and scores (right) for data collected from all temperatures and the combined low and mid-frequency Raman spectral region. For ease of visualization, the mean scores value at each time point for each replicate run is shown.
